# Supplementary material for: Biocompatible Materials Based on Self-Assembling Peptides on Ti25Nb10Zr Alloy: Molecular Structure and Organization Investigated by Synchrotron Radiation Induced Techniques
Source: PubMed Central journal article supplement (PMC5869639; doi:10.3390/nano8030148), 2018-03-07

# **Biocompatible Materials Based on Self-Assembling Peptides on Ti<sub>25</sub>Nb<sub>10</sub>Zr Alloy: Molecular Structure and Organization Investigated by Synchrotron Radiation Induced Techniques.**

**Valeria Secchi**<sup>1</sup>, **Stefano Franchi**<sup>1,\*†</sup>, **Marta Santi**<sup>1</sup>, **Alina Vladescu**<sup>2</sup>, **Mariana Braic**<sup>2</sup>, **Tomáš Skála**<sup>3</sup>, **Jaroslava Nováková**<sup>3</sup>, **Monica Dettin**<sup>4</sup>, **Annj Zamuner**<sup>4</sup>, **Giovanna Iucci**<sup>1</sup> and **Chiara Battocchio**<sup>1,\*</sup>

<sup>1</sup> Department of Science, Roma Tre University of Rome, Via della Vasca Navale 79, 00146 Rome, Italy; valeria.secchi@uniroma3.it (V.S.); santimarta3@gmail.com (M.S.); giovanna.iucci@uniroma3.it (G.I.)

<sup>2</sup> National Institute for Optoelectronics, 409 Atomistilor St., 077125 Magurele, Romania; alinava@inoe.ro (A.V.); mariana.braic@inoe.ro (M.B.)

<sup>3</sup> Department of Surface and Plasma Science, Faculty of Mathematics and Physics, Charles University, V Holešovičkách 2, 18000 Prague, Czech Republic; tomas.skala@elettra.eu (T.S.); jaroslava.lavkova@gmail.com (J.N.)

<sup>4</sup> Department of Industrial Engineering, University of Padua, Via Marzolo, 9, Padua 35131, Italy; monica.dettin@unipd.it (M.D.); annj.zamuner@studenti.unipd.it (A.Z.)

\* Correspondence: stefano.franchi@elettra.eu (S.F.); chiara.battocchio@uniroma3.it (C.B.); Tel.: +39-040-3758059 (S.F.); +39-06-5733-3400 (C.B.)

† Present Address: Elettra-Sincrotrone Trieste S.C.p.A. di interesse nazionale, Strada Statale 14-km 163,5 in AREA Science Park, 34149 Basovizza, Trieste, Italy.

*Supplementary Material*

**Figure S1.** Total EDS mapping spectrum and relative distribution of the concentration of each constituent element on the Ti25Nb10Zr alloy surface performed in one scanned zone on the surface (zone 4 of Table S1)

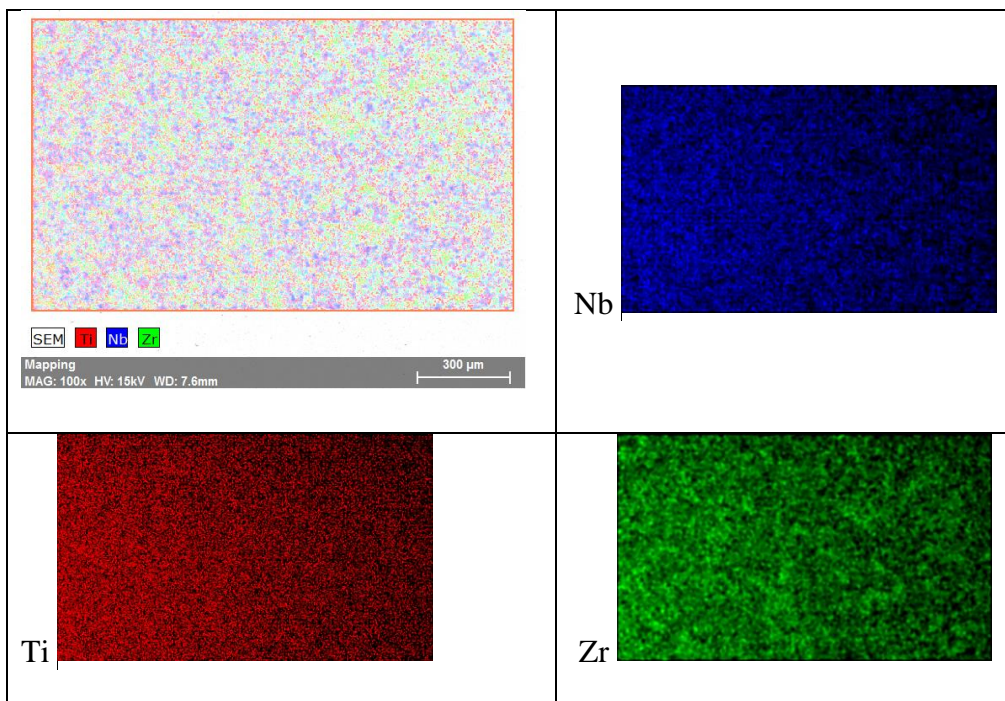

**Table S1.** The elemental composition of the alloy determined by EDS measurements

| Zone    | Ti (wt%)   | Nb(wt %)   | Zr (wt %) |
|---------|------------|------------|-----------|
| Zone 1  | 68.7       | 21.9       | 9.4       |
| Zone 2  | 69.2       | 21.6       | 9.2       |
| Zone 3  | 68.7       | 22.1       | 9.2       |
| Zone 4  | 68.8       | 21.8       | 9.4       |
| Average | 68.85±0.24 | 21.85±0.21 | 9.3±0.11  |

**Table S2.** Binding Energies in eV of the atomic species present on Clean Surface Sample and relative atomic ratios. Me-Ox: oxygen of metal oxides; O-org: organic oxygen.

|                  | C1s   |             |             |              | O1s   |                            |                  | Ti2p <sub>3/2</sub> | Nb3d <sub>5/2</sub> | Zr3d <sub>5/2</sub> |
|------------------|-------|-------------|-------------|--------------|-------|----------------------------|------------------|---------------------|---------------------|---------------------|
|                  | C-C   | C-O         | C=O         | COOH         | Me-Ox | O-org                      | H <sub>2</sub> O |                     |                     |                     |
| B.E. (eV)        | 285.0 | 286.4       | 287.9       | 288.1        | 530.1 | 531.8                      | 533.3            | 458.5               | 207.1               | 182.2               |
| FWHM (eV)        | 1.6   | 1.6         | 1.6         | 1.6          | 1.8   | 1.8                        | 1.8              | 1.8                 | 1.7                 | 1.6                 |
|                  |       |             |             |              |       |                            |                  |                     |                     |                     |
|                  |       | C-O/<br>C-C | C=O/<br>C-C | COOH/<br>C-C |       | O org/<br>TiO <sub>2</sub> | C tot<br>/Ti     | Ti/Nb               | Ti/Zr               | Nb/Zr               |
| Atomic Ratio (%) |       | 31          | 12          | 13           |       | 61                         | 676              | 380                 | 522                 | 159                 |

**Table S3.** Binding Energies in eV of the atomic species present on MUL samples surface. N+: protonated nitrogen; Me-Ox: oxygen of metal oxides; O-org: organic oxygen; ----: not detected.

| MUL sample | C1s         |             |               |              | N1s       |            | O1s          |               |                          | Ti2p <sub>3/2</sub><br>(eV) | Nb3d <sub>5/2</sub><br>(eV) | Zr3d <sub>5/2</sub><br>(eV) |
|------------|-------------|-------------|---------------|--------------|-----------|------------|--------------|---------------|--------------------------|-----------------------------|-----------------------------|-----------------------------|
|            | C-C<br>(eV) | C-N<br>(eV) | N-C=O<br>(eV) | COOH<br>(eV) | N<br>(eV) | N+<br>(eV) | M-Ox<br>(eV) | O-org<br>(eV) | H <sub>2</sub> O<br>(eV) |                             |                             |                             |
| pH 2       | 285.0       | 286.3       | 288.1         | 289.1        | 400.1     | 401.7      |              | 531.4         | 533.3                    |                             |                             |                             |
| FWHM       | 1.5         | 1.5         | 1.5           | 1.5          | 1.6       | 1.6        |              | 2.2           | 2.2                      |                             |                             |                             |
| pH 4       | 285.0       | 286.3       | 288.3         | 289.5        | 400.2     | 401.8      |              | 531.7         | 533.5                    |                             |                             |                             |
| FWHM       | 1.6         | 1.6         | 1.6           | 1.6          | 1.6       | 1.6        |              | 2.1           | 2.1                      |                             |                             |                             |
| pH 7       | 285.0       | 286.3       | 287.6         | 289.0        | 401.3     |            | 530.8        | 532.7         | 534.2                    | 459.5                       | 208.2                       |                             |
| FWHM       | 1.6         | 1.6         | 1.6           | 1.6          | 1.9       |            | 2.0          | 2.0           | 2.0                      | 2.3                         | 1.9                         |                             |
| pH 10      | 285.0       | 286.3       | 288.2         | 289.3        | 400.1     | 401.8      |              | 531.2         | 533.0                    |                             |                             |                             |
| FWHM       | 1.6         | 1.6         | 1.6           | 1.6          | 1.6       | 1.6        |              | 2.1           | 2.1                      |                             |                             |                             |
| pH 12      | 285.0       | 286.3       | 288.1         | 289.1        | 400.2     | 401.9      | 530.8        | 532.6         | 534.6                    | 458.5                       | 207.1                       | 182.1                       |
| FWHM       | 1.6         | 1.6         | 1.6           | 1.6          | 1.6       | 1.6        | 2.3          | 2.3           | 2.3                      | 1.9                         | 2.0                         | 2.1                         |

**Table S4.** Binding Energies in eV of the atomic species present on ML sample surface. N+: protonated nitrogen; Me-Ox: oxygen of metal oxides; O-org: organic oxygen.

| ML Sample | C1s      |          |            |           | N1s    |         | O1s                   |            |                       | Ti 2p 3/2 (eV) | Nb 3d 5/2 (eV) | Zr 3d 5/2 (eV) |
|-----------|----------|----------|------------|-----------|--------|---------|-----------------------|------------|-----------------------|----------------|----------------|----------------|
|           | C-C (eV) | C-N (eV) | N-C=O (eV) | COOH (eV) | N (eV) | N+ (eV) | M-O <sub>x</sub> (eV) | O-org (eV) | H <sub>2</sub> O (eV) |                |                |                |
| pH 2      | 255.0    | 286.4    | 288.1      | 289.2     | 400.2  | 401.8   | 530.2                 | 531.7      | 533.3                 | 458.8          | 207.1          | 182.2          |
| FWHM      | 1.6      | 1.6      | 1.6        | 1.6       | 1.6    | 1.6     | 1.9                   | 1.9        | 1.9                   | 1.9            | 1.6            | 1.4            |
| pH 4      | 285.0    | 288.0    | 286.3      | 289.1     | 400.0  | 401.4   | 530.3                 | 531.6      | 533.2                 | 458.5          | 207.0          | 182.1          |
| FWHM      | 1.5      | 1.5      | 1.5        | 1.5       | 1.5    | 1.5     | 2.1                   | 2.1        | 2.1                   | 1.7            | 2.3            | 2.1            |
| pH 7      | 285.0    | 286.3    | 287.3      | 289.0     | 400.1  | 401.4   | 530.3                 | 531.9      | 533.5                 | 458.6          | 207.3          | 182.3          |
| FWHM      | 1.6      | 1.6      | 1.6        | 1.6       | 1.7    | 1.7     | 2.0                   | 2.0        | 2.0                   | 1.9            | 1.7            | 1.7            |
| pH 10     | 285.0    | 286.3    | 288.0      | 289.2     | 400.2  |         | 530.4                 | 531.7      | 533.3                 | 458.7          | 207.3          | 182.4          |
| FWHM      | 1.6      | 1.6      | 1.6        | 1.6       | 1.8    |         | 2.1                   | 2.1        | 2.1                   | 1.8            | 1.5            | 1.8            |
| pH 12     | 285.0    | 286.4    | 287.9      | 289.1     | 400.3  |         | 530.6                 | 532.1      | 533.7                 | 458.7          | 207.4          | 182.5          |
| FWHM      | 1.6      | 1.6      | 1.6        | 1.6       | 1.8    |         | 2.0                   | 2.0        | 2.0                   | 1.7            | 1.7            | 2.0            |

**Figure S2.** AFM image of Clean Surface Sample

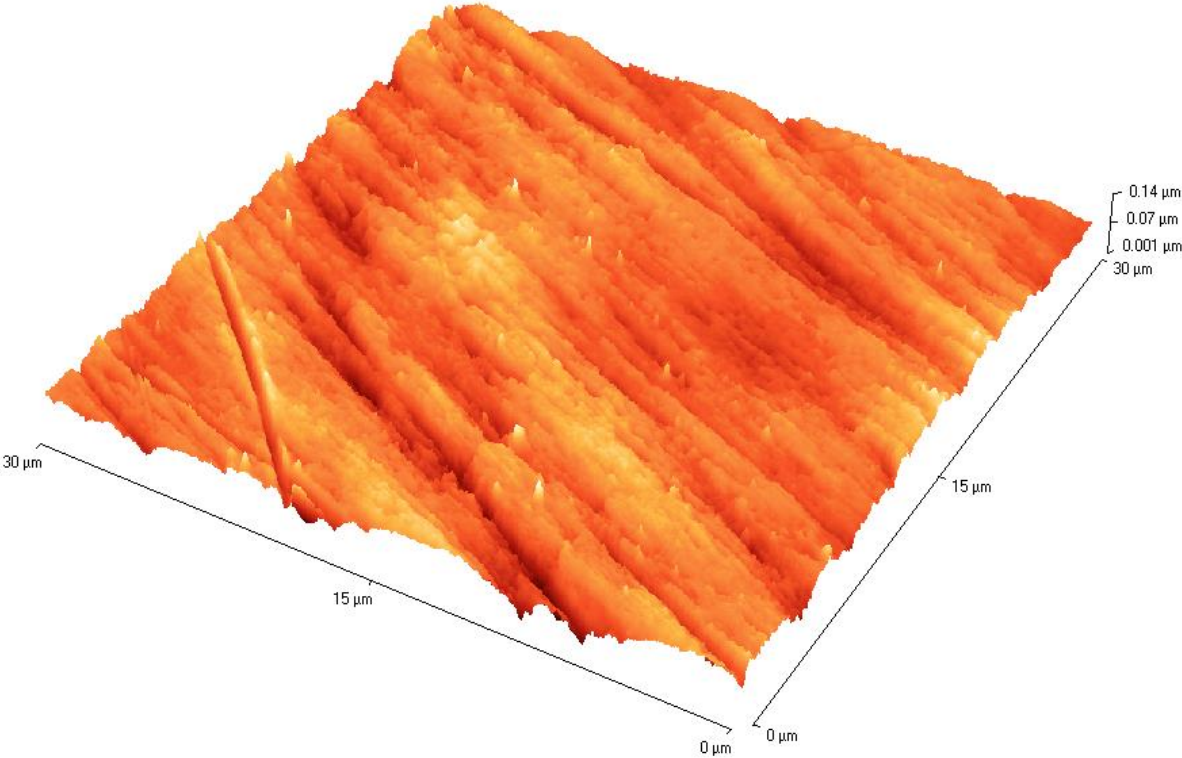

Supplement: nanomaterials-08-00148-s001.pdf [file nanomaterials-08-00148-s001.pdf]
